# Supplementary material for: Development and Validation of Decision Rules to Guide Frequency of Monitoring CD4 Cell Count in HIV-1 Infection before Starting Antiretroviral Therapy
Source: PLoS One. 2011 Apr 8;6(4):e18578. doi: 10.1371/journal.pone.0018578 (PMC3072996; doi:10.1371/journal.pone.0018578)
Supplement: Excel Tool S1 — An easy-to-use computer tool to assist CD4 cell count monitoring in HIV infection before starting antiretroviral therapy. It implements both the snap-shot rule and the track-shot rule to guide CD4 determination frequency. (XLS) [file pone.0018578.s004.xls]

## Sheet: Sheet1
	Centre of Evidence-Based Medicine, University of Oxford												Division of Clinical Pharmacology, University Hospital of Lausanne
						Monitoring CD4 Cell Count in HIV-1 Infection
						Before Starting Antiretroviral Therapy:
						a Decision Rule to Guide Determination Frequency
		These rules are based on a linear mixed-effects model of the fall in CD4 cell count (in the square root scale).
		They will indicate the time to next measurement for the result to have a given probability of reaching a
		predefined target threshold, indicating antiretroviral therapy initiation. The Snap-shot Rule uses a single
		current CD4 count while the Track-shot Rule integrates previous results. These rules must be used by trained
		clinicians only as an aid to decision making, taking into account all other aspects of the patient's condition.
		(See Buclin T, Telenti A, Perera F, Csajka C, Furrer H, Aronson JK, Glasziou P. Development and Validation of Decision Rules to Guide
		Frequency of Monitoring CD4 Cell Count in HIV-1 Infection before Starting Antiretroviral Therapy. PloS ONE 2011)
	Laboratory for CD4 cells count determination:						Patient Identification:
	<fill here the lab name and address>						<fill here the name of the patient>
							Approximative date of seroconversion (if known)					2008-01-02	dd/mm/yy
													2008-01-02
	Physician:						CD4 cells count results:								Y	T	ST2	STY
	<indicate here the practitioner in charge of the patient>						Current result:		875	106/L	Date:	2011-07-01	dd/mm/yy		29.5804	3.4935	12.2045	103.339
							(for both Snap-shot and Track-shot rules)
							Anterior results:		1050	106/L	Dates:	2010-12-21	dd/mm/yy		32.4037	2.96783	8.80802	96.1687
							(for Track-shot rule)		1000	''		2010-09-19	''		31.6228	2.71321	7.36151	85.7992
	Conditions for Rules operation:								750	''		2010-06-02	''		27.3861	2.41478	5.83118	66.1316
	Target CD4 count		350	106/L	18.7083				835	''		2010-03-01	''		28.8964	2.16016	4.66631	62.4209
	(considered to indicate therapy initiation in this patient)								1220	''		2009-01-07	''		34.9285	1.01574	1.03173	35.4784
	Probability level		0.05		1.64485
	(desired for the next measurement to reach the target)
	Underlying model parameter values:
	Population slope b		1.8	(count).5/year	1.8
	Inter-patient sb		1.2	(count).5/year
	Population intercept a		30	(count).5
	Inter-patient sa		5	(count).5	5
	Intra-patient se		4	(count).5
									6		2009-01-01	6			184.818	14.7652	39.9033	449.338
	Snap-shot rule (based on the current result alone):						Track-shot rule (based on multiple serial measurements):
	This rule uses the average population slope b						Individual slope b		1.33833	(count).5/year
	and only the current CD4 cell count						Individual intercept a		33.7016	(count).5	29.0262
	Next date for CD4 cell measurement						Next date for CD4 cell measurement
	having at least 5% chance (i.e. 1 in 20)						having at least 5% chance (i.e. 1 in 20)
	to reach a count of 350 x 10°/L:						to reach a count of 350 x 10°/L:
	Tnext by SS Rule =		2012-04-17 05:39:37		403.723		Tnext by TS Rule =		2013-04-12 11:10:27		308.457
I	T	Tyear	Cart	Cobs	Cpred	Cinf		T	Tyear	Cart	Cobs	Cpred	Cinf	Tyearobs	Cobs
O	2011-07-01	2011.5	350	875				2011-07-01	2011.5	350	875			2010.97	1050
N	2012-04-17 05:39:37	2012.29			792.149	0		2013-04-12 11:10:27	2013.28			709.641	0	2010.72	1000
	2012-04-17 05:39:37	2012.29				70		2013-04-12 11:10:27	2013.28				70	2010.42	750
	2012-04-17 05:39:37	2012.29				350		2013-04-12 11:10:27	2013.28				350	2010.16	835
0	2010-01-01	2010	350		#N/A	#N/A		2008-01-01	2008	350		#N/A	#N/A	2009.02	1220
1	2010-04-13 06:43:12	2010.28	350		#N/A	#N/A		2008-05-26 02:52:48	2008.4	350		#N/A	#N/A	#N/A	#N/A
2	2010-07-24 13:26:24	2010.56	350		#N/A	#N/A		2008-10-19 05:45:36	2008.8	350		1065.01	#N/A	#N/A	#N/A
3	2010-11-03 20:09:36	2010.84	350		#N/A	#N/A		2009-03-14 08:38:24	2009.2	350		1030.35	#N/A	#N/A	#N/A
4	2011-02-14 02:52:48	2011.12	350		#N/A	#N/A		2009-08-07 11:31:12	2009.6	350		996.263	#N/A	#N/A	#N/A
5	2011-05-27 09:36:00	2011.4	350		#N/A	#N/A		2009-12-31 14:24:00	2010	350		962.751	#N/A	#N/A	#N/A
6	2011-09-06 16:19:12	2011.68	350		855.379	397.403		2010-05-26 17:16:48	2010.4	350		929.813	#N/A	#N/A	#N/A
7	2011-12-17 23:02:24	2011.96	350		826.149	376.084		2010-10-19 20:09:36	2010.8	350		897.448	#N/A	#N/A	#N/A
8	2012-03-29 05:45:36	2012.24	350		797.428	354.135		2011-03-14 23:02:24	2011.2	350		865.656	#N/A	#N/A	#N/A
9	2012-07-09 12:28:48	2012.52	350		769.214	331.693		2011-08-08 01:55:12	2011.6	350		834.437	474.24	#N/A	#N/A
10	2012-10-19 19:12:00	2012.8	350		741.509	308.909		2012-01-01 04:48:00	2012	350		803.792	448.392	#N/A	#N/A
11	2013-01-30 01:55:12	2013.08	350		714.312	285.941		2012-05-26 07:40:48	2012.4	350		773.72	419.778	#N/A	#N/A
12	2013-05-12 08:38:24	2013.36	350		687.623	262.952		2012-10-19 10:33:36	2012.8	350		744.221	388.95
13	2013-08-22 15:21:36	2013.64	350		661.442	240.109		2013-03-14 13:26:24	2013.2	350		715.295	356.541
14	2013-12-02 22:04:48	2013.92	350		635.769	217.573		2013-08-07 16:19:12	2013.6	350		686.943	323.209
15	2014-03-15 04:48:00	2014.2	350		610.605	195.5		2013-12-31 19:12:00	2014	350		659.165	289.587
16	2014-06-25 11:31:12	2014.48	350		585.948	174.043		2014-05-26 22:04:48	2014.4	350		631.959	256.252
17	2014-10-05 18:14:24	2014.76	350		561.8	153.341		2014-10-20 00:57:36	2014.8	350		605.327	223.714
18	2015-01-16 00:57:36	2015.04	350		538.16	133.528		2015-03-15 03:50:24	2015.2	350		579.268	192.408
19	2015-04-28 07:40:48	2015.32	350		515.028	114.726		2015-08-08 06:43:12	2015.6	350		553.783	162.699
20	2015-08-08 14:24:00	2015.6	350		492.404	97.046		2016-01-01 09:36:00	2016	350		528.87	134.894
21	2015-11-18 21:07:12	2015.88	350		470.288	80.5918		2016-05-26 12:28:48	2016.4	350		504.532	109.245
22	2016-02-29 03:50:24	2016.16	350		448.68	65.4561		2016-10-19 15:21:36	2016.8	350		480.766	85.96
23	2016-06-10 10:33:36	2016.44	350		427.581	51.7235		2017-03-14 18:14:24	2017.2	350		457.574	65.2105
24	2016-09-20 17:16:48	2016.72	350		406.989	39.4702		2017-08-07 21:07:12	2017.6	350		434.955	47.1388
25	2017-01-01	2017	350		386.906	28.7647		2018-01-01	2018	350		412.909	31.8628
